# Supplementary figures and images for: Ecological Succession and Stochastic Variation in the Assembly of Arabidopsis thaliana Phyllosphere Communities
Source: PubMed Central journal article supplement — mBio. 2014 Jan 21;5(1):e00682-13. doi: 10.1128/mBio.00682-13 (PMC3903271; doi:10.1128/mbio.00682-13), 2014-01-21

Figure S2

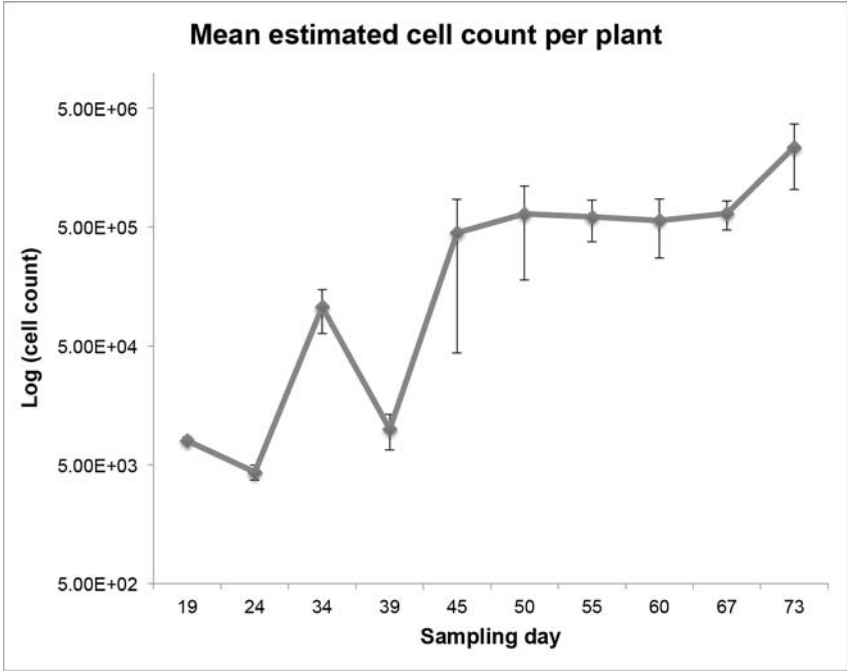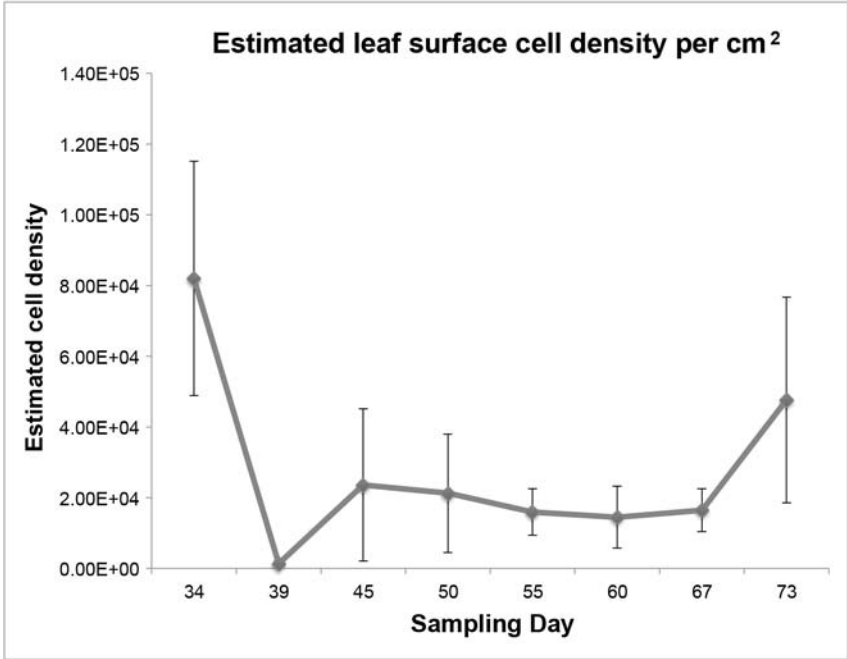

Supplement: mbo001141715sf02.pdf [file mbo001141715sf02.pdf]

Figure S4

(A)

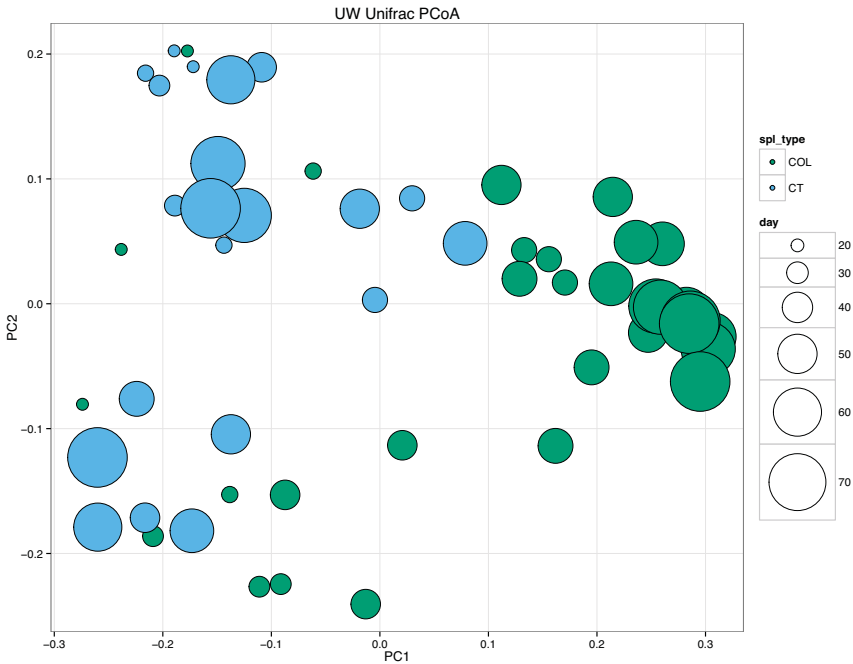

(B)

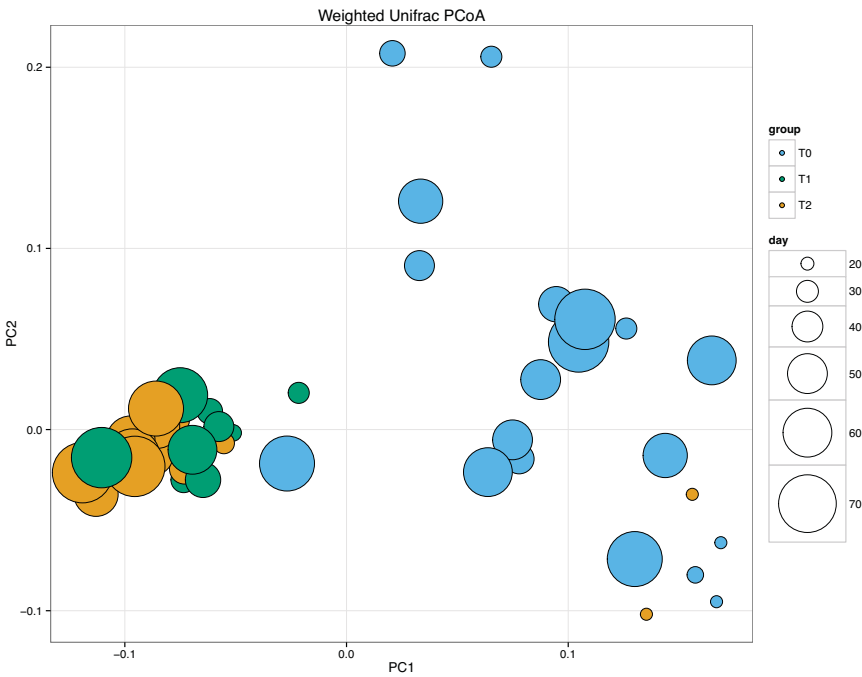

Supplement: mbo001141715sf04.pdf [file mbo001141715sf04.pdf]
